# Supplementary material
Source: MDPI journal article supplement (https://www.mdpi.com/2077-0472/13/5/1098)
Supplement: s1 [file s1]

**Table S1.** Morphological, biochemical and percentage of identification by API 50 CHL, and ABIS online for *Lactobacillus* strains isolated from piglets GIT.

[illegible]

|                               |                 |   |                 |                     |   |       |   |   |              |       |                 |                 |   |   |
|-------------------------------|-----------------|---|-----------------|---------------------|---|-------|---|---|--------------|-------|-----------------|-----------------|---|---|
| N-acetylglucosamine           | -               | - | ?               | -<br>/24h;<br>+/48h | - | +     | + | - | ?/24-<br>72h | -     | +               | ?/24h;<br>+/48h | - | - |
| Amygdalin                     | -               | - | -               | -                   | - | +     | - | - | -            | -     | ?/24h;<br>+/72h | -               | - | - |
| Arbutin                       | -               | - | -               | -                   | - | +     | - | - | -            | -     | +               | -               | - | - |
| Esculin                       | -               | - | -/24h;<br>+/48h | -<br>/24h;<br>?/72h | + | +     | - | - | +/48h        | -     | +               | -               | - | - |
| Salicin                       | -               | - | -               | -                   | - | +     | - | - | -            | -     | +               | -               | - | - |
| D-cellobiose                  | -               | - | -               | -                   | ? | +     | - | - | +            | -     | +               | -               | - | - |
| D-maltose                     | +               | + | +               | +                   | + | +     | + | + | +            | +     | +               | +               | + | + |
| D-lactose                     | +               | + | -               | -                   | ? | +     | + | + | +            | +     | +               | -               | + | + |
| D-melibiose                   | +               | + | -               | -                   | - | +     | + | + | ?/48-<br>72h | +     | -/24h;<br>+/48h | ?/24h;<br>+/48h | + | + |
| D-saccharose<br>(sucrose)     | +               | + | -/24h;<br>+/48h | -<br>/24h;<br>?/24h | + | +     | + | + | +            | +     | +               | +               | + | + |
| D-trehalose                   | -               | - | -               | -                   | - | +     | + | - | -            | -     | +               | -               | - | - |
| Inulin                        | -               | - | -               | -                   | - | -     | - | - | -            | -     | -               | -               | - | - |
| D-melezitose                  | -               | - | -               | -                   | - | -     | - | - | -            | -     | -               | -               | - | - |
| D-raffinose                   | +               | + | -               | -                   | ? | +/48h | + | + | ?            | +     | +               | +               | + | + |
| Starch                        | -               | - | -/24h;<br>+/48h | -                   | ? | -     | - | - | ?            | -     | ?/24h;<br>+/48h | -               | - | - |
| Glycogen                      | -               | - | -               | -                   | - | -     | - | - | -            | -     | -               | -               | - | - |
| Xylitol                       | -               | - | -               | -                   | - | -     | - | - | -            | -     | -               | -               | - | - |
| Gentibiose                    | -               | - | -               | -                   | - | ?     | - | - | ?            | -     | ?/24h;<br>+/48h | -               | - | - |
| D-turanose                    | -               | - | -               | -                   | - | -     | - | - | -            | -     | -               | -               | - | - |
| D-lyxose                      | -               | - | -               | -                   | - | -     | - | - | -            | -     | -               | -               | - | - |
| D-tagatose                    | -               | - | -               | -                   | - | -     | - | - | -            | -     | -               | -               | - | - |
| D-fucose                      | -               | - | -               | -                   | - | -     | - | - | -            | -     | -               | -               | - | - |
| L-fucose                      | -               | - | -               | -                   | - | -     | + | - | -            | -     | -               | -               | - | - |
| D-arabitol                    | -               | - | -               | -                   | - | -     | - | - | -            | -     | -               | -               | - | - |
| L-arabitol                    | -               | - | -               | -                   | - | -     | - | - | -            | -     | -               | -               | - | - |
| Potassium gluconate           | ?               | - | -               | -                   | - | ?     | - | - | -            | ?     | -               | -               | - | + |
| Potassium 2-<br>ketogluconate | -               | - | -               | -                   | - | -     | - | - | -            | -     | -               | -               | - | - |
| Potassium 5-<br>ketogluconate | -/24h;<br>?/48h | - | -               | -                   | - | -     | - | - | -            | ?/48h | -               | -               | - | - |

|                      |      |      |      |      |      |      |      |      |      |      |      |      |      |      |
|----------------------|------|------|------|------|------|------|------|------|------|------|------|------|------|------|
| <b>API 50 CHL %</b>  | 99.8 | 97.4 | 90.1 | 78   | 74.7 | 85.4 | 99.9 | 97.3 | 93.9 | 95.9 | 74.4 | 67.1 | 97.4 | 96.9 |
| <b>ABIS online %</b> | 91.8 | 88.5 | 75.8 | 91.8 | 88.1 | 90.5 | 93.7 | 88.1 | 91.6 | 91.6 | 88.3 | 85.2 | 85.2 | 85.6 |

1: *L. fermentum* biotype 1, IBNA 71; 2: *L. fermentum* biotype 1, IBNA 75; 3: *L. acidophilus*, IBNA 76; 4: *L. delbrueckii*, IBNA 77; 5: *L. acidophilus* biotype 3, IBNA 81; 6: *L. plantarum* biotype 1, IBNA 84; 7: *L. salivarius*, IBNA 87; 8: *L. fermentum* biotype 1, IBNA 90; 9: *L. acidophilus* biotype 3, IBNA 94; 10: *L. fermentum* biotype 1, IBNA 95; 11: *L. acidophilus* biotype 1, IBNA 64; 12: *L. acidophilus* biotype 1, IBNA 70; 13: *L. fermentum* biotype 1, IBNA 78; 14: *L. plantarum* biotype 1, IBNA 85; a: Gram labile bacilli short or infrequent cocobacilli, thickness, nonspore forming, arranged in long chains or irregular small piles; b: Gram positive, nonspore forming with thick rods or medium, long or short filaments (grouped) slightly curved, straight ends, arranged diplo, in short chains or in palisade; c: Gram-positive medium, non-spore forming rods, grouped diplo or in short filaments or irregular piles, with metachromatic granules per cell; x: small, medium or large colonies, 2.0-3.0 mm in diameter, R type, semi-transparent, opaque or colourless on MRS agar, low turbidity, difficult to homogenize, low deposit, lenticular, with granular formation; y: small/medium/large colonies, 1.0-4.0 mm in diameter, S type, round, opaque/whitish/colourless, semi-transparent, easily/intense homogeneous, low deposition in MRS broth, lenticular, without surface formations; z: small, 0.5-1.0 mm in diameter, S type, opaque/whitish, glossy colonies medium/low turbidity, inhomogeneous, with flakes in suspension, abundant storage, granular; t: small/medium colonies, semi-transparent, colourless or whitish, 1.0-2.0 mm in diameter, R type, flattened, with finely serrated edges, absent or reduced turbidity, inhomogeneous, medium deposit; f: medium/large colonies, opaque/whitish, S type, 1.0-3.0 mm in diameter, low/medium/intense turbidity in MRS broth, inhomogeneous, abundant/granular medium deposit, powdery, without surface formations.
